# Supplementary material for: Pharmacological NF‐κB inhibition decreases cisplatin chemoresistance in muscle‐invasive bladder cancer and reduces cisplatin‐induced toxicities
Source: PubMed Central journal article supplement (PMC10701775; doi:10.1002/1878-0261.13504), 2023-09-20

# Supplementary figure 1

## Bone marrow

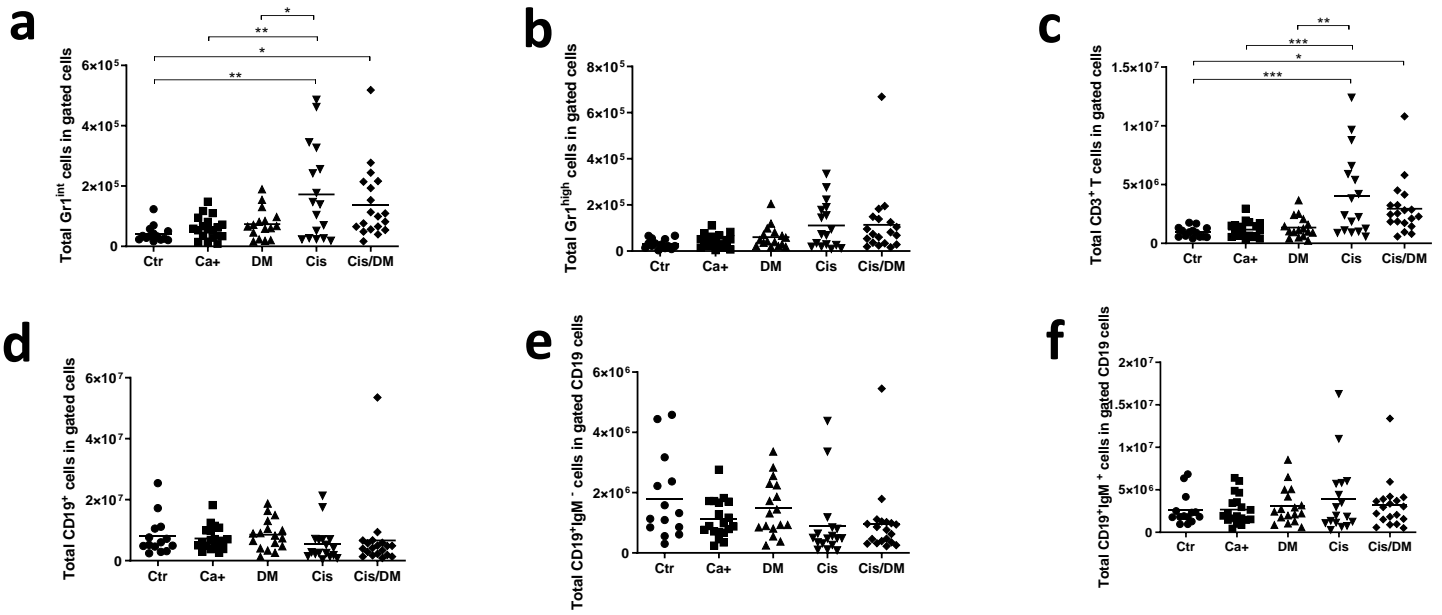

## Thymus

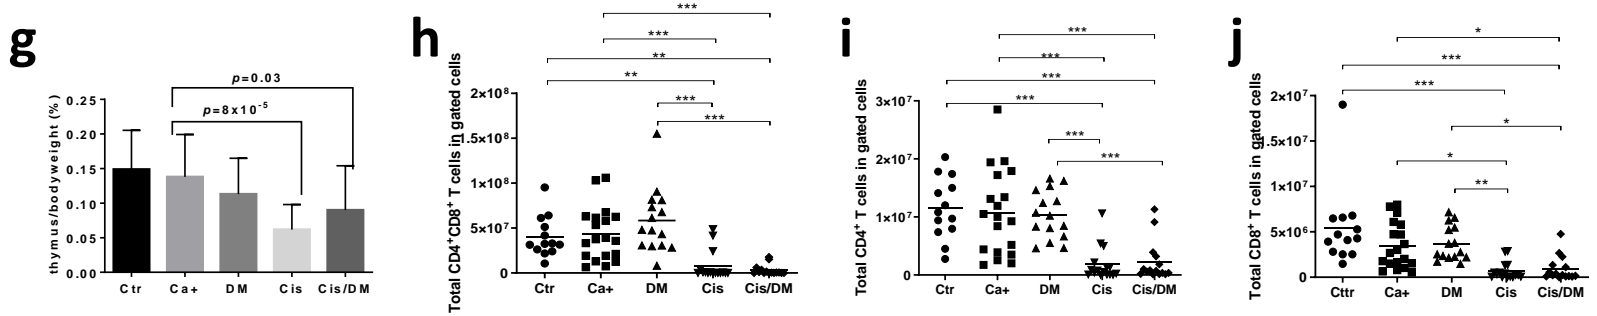

## Spleen

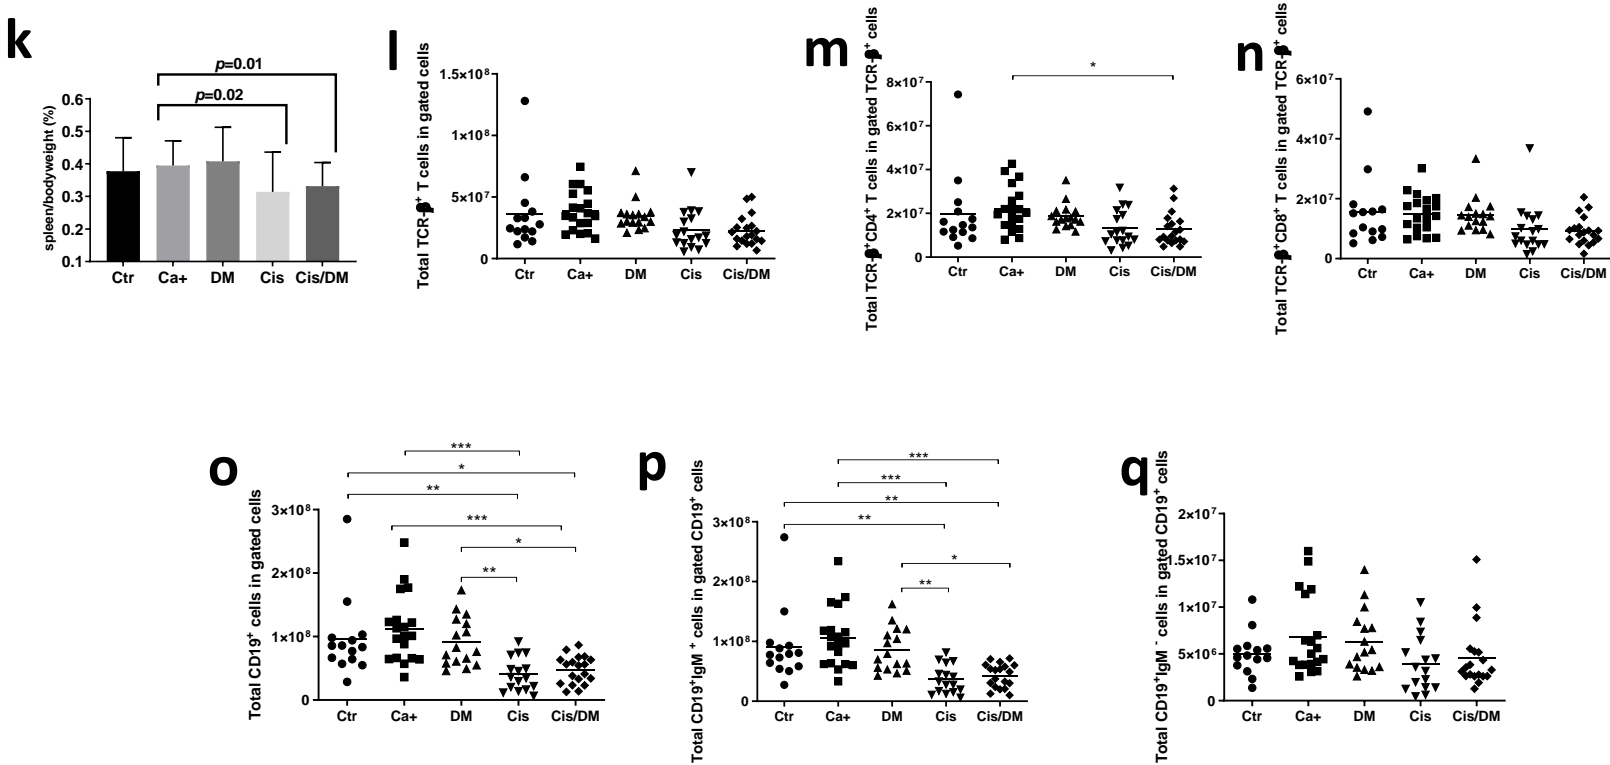

Supplement: MOL2-17-2709-s004.pdf [file MOL2-17-2709-s004.pdf]
